# Supplementary material for: Bias-Corrected Targeted Next-Generation Sequencing for Rapid, Multiplexed Detection of Actionable Alterations in Cell-Free DNA from Advanced Lung Cancer Patients
Source: Oxford University Press journal article supplement (doi:10.1158/1078-0432.ccr-15-1627-t), 2015-10-13
Supplement: 10780432ccr151627t-sup-152484_1_supp_3149951_n993k9.xlsx [file 10780432ccr151627t-sup-152484_1_supp_3149951_n993k9.xlsx]

## Sheet: Sheet1
probe name	probe sequence (5'->3')
ALK_1_f	CGAATGAGGGTGATGTTTTTCCGCGGCACCTCCTTCAGGT
ALK_2_f	GTTGTAGTCGGTCATGATGGTCGAGGTGCGGAGCTTGCTC
ALK_3_f	GCAGCTCCTGGTGCTTCCGGCGGTACACTGCAGGTGGGTG
ALK_4_f	CTACACAGGCCACTTCCTACAGGAAGCCTCCCTGGATCTC
ALK_5_f	GAAATACTAATAAAATGATTAAAGAAGGTGTGTCTTTAAT
ALK_6_f	TATATGGAAAATAATTATTTGTATTATATAGGGCAGAGTC
ALK_7_f	ATTAGACCCAATATGGTCTGCAGATTTTATTAGAAGAAAT
ALK_8_f	GTGAACCAGCAGACTGTGTTGCAAGTATAACCCCACGTGA
ALK_9_f	GCCATGGAGCCTAAGGAAGTTTCAGCAAGGCCCTAAGGGG
ALK_10_f	CCCAGGAATTGGCCTGCCTTAGTATTTCTGCTGTGCTCAG
ALK_11_f	TTTGAGGGTGCAGCTGGGATCTTGGTCAGTTGTGTTTCCT
ALK_12_f	CACATCATGAAAAGATCTCTGAATTGGTGTCTGGGGATCT
ALK_13_f	TGAGGACCAGGTCACAGGACCTCTTTGGACTGCAGTTTCC
ALK_14_f	TAACCACTGCCACTCCCCACCCTCTAGGGTTGTCAATGAA
ALK_15_f	GAGCTCTACCAATGTGAGTGACCATTATCACTCCTACATG
ALK_16_f	AAAATTGTGATTCAGTGGGTAGATTCTGTGTGTAAAGCCC
ALK_17_f	TATGTGCTCAGTTCCCTCCTCTATGCAATGGACCGACCGT
ALK_18_f	GTGTAAATTGCCGAGCACGTAGTAACCATGCAACAAGTGT
ALK_19_f	TGGGGACACAGTGTGTGCTGCCATCTCCCTTCTACCGGCA
ALK_20_f	AAGAGCCTTTCCCTCTGCCCTTTTCAAGCCTCTGCCCATC
ALK_21_f	GACCACACTGAGTTCTCTGTGACCTGCAGGTCAGCTCACC
ALK_22_f	TTTCCTATCTCTCTGCCTGGAGGGTGGTGGAGGGCTGGTT
ALK_23_f	AAACAGGAGCTGCGCCGGTGGAAGCATGTGGGAGCTAGAA
ALK_24_f	GGACACTGAAGGAGCTCCCCACCCCCTGATCAGCCAGGAG
ALK_25_f	GGGAACTGCAGCTGCTCTGGTGGGGGGAAGGTTGGGAGCT
ALK_26_f	ACCCAATTCCAGGGACTAGCATAACGAAGTGACACCTTGG
ALK_27_f	CCTGCCCCCTTGGGAGTCCCTGGGGCTCTGTGCACTCACC
ALK_1b_f	CTGCACCCCTCTCCTCCCAGGACGGCAGCAGGGCGCTCAC
ALK_2b_f	CACTGATGGAGGAGGTCTTGCCAGCAAAGCAGTAGTTGGG
ALK_3b_f	AGCTTGTACTCAGGGCTCTGCAGCTCCATCTGCATGGCTT
ALK_4b_f	GTCAGCTGCAACATGGCCTGGCAGCCTGGCCCTTGAAGCA
ALK_5b_f	CATATCCTCCCCTGAGCTCTGAACCTTTCCATCATACTTA
ALK_6b_f	TGAAGCATGATTTAAAGTAAATGCAAAGCTAAAAATCAGA
ALK_7b_f	ATGTTAGTCTGGTTCCTCCAAGAAGCAGACTGGAGATGGG
ALK_9b_f	ACGAGGGAGGGAGGGAAGGTTGGGTGGAAGCACCCTGGGT
ALK_10b_f	TTCTGGAGCCAAAGTCAGTCATCAGAGGAGTCCCATGACT
ALK_11b_f	CCATTGGGTAGGGCAGCTTCAGTGCAATCACAGCAGTGGA
ALK_12b_f	ATAGTTGGAGAACTGCCAAGCCACAGAGTTGGAGAAGAGC
ALK_13b_f	GTGCTCTAATTCCGCCTCTTGTTACTTACAAGCTGAGCCA
ALK_14b_f	CTCTCTGTAGGCAGGGATGGTAACTCCTGCCCTGTTTCCC
ALK_15b_f	ATGAATTCACCAACATAAAATGGTTTTGAAAAATCCTAAA
ALK_16b_f	TGAGGATGTTCTGGAAGGCAAACTCCATGGAAGCCAGAAC
ALK_17b_f	AGCCCCCCAACACATGGGCCAGGGCAAATGAGTCACCCGC
ALK_18b_f	GATCAGATTAGGGTTACCTGAGGATCGAATGAATTGAAAT
ALK_19b_f	TAGCTCCTATTATCCTGTCCCTTTGAGGGATGGCACCATA
ALK_20b_f	GATCCCTTTGCCTGCAGGGGCCTGGCCTGCGAGGGCTCTC
ALK_21b_f	TGTCCTGGGCATGTCTCTGCCAGCAGTAAGAGCTGGTTGG
ALK_22b_f	TTGGCTCACAGGCTGAACAGAAATATACTCAGAAACCGAT
ALK_23b_f	TGGGGAAGAGTGGGCTAGTGCATTACATAGGGTGGGAGCC
ALK_24b_f	GTGACGTCTAGGGGTGGGGGCGAGCTTTCACCATCGTGAT
ALK_25b_f	GATACACACGGGGCTGAGGTGCAGAATCAGGGGCTCCTCA
ALK_26b_f	TCCGTTTTGGCTTGGCCTGGGCTGCCCTAATCACCACCCC
ALK_27b_f	CACCTGTGGCACAGCCTGAGACACTATTCAGTCCTGCCTT
ALK_8d_f	TAGAAGAAATGCCCATGAGAGGAAATGGGGAGGGAGCCAG
BRAFr11:-34:6_f	TGACTTGTCACAATGTCACCACATTACATACTTACCATGC
BRAFr11:88:+8_r	TTATCAAGAAAACACTTGGTAGACGGGACTCGAGTGATGA
BRAFr15:-9:31_f	CAATTCTTACCATCCACAAAATGGATCCAGACAACTGTTC
BRAFr15:93:+12_r	ACTACACCTCAGATATATTTCTTCATGAAGACCTCACAGT
EGFRr18:-47:-8_f	TGGTGAGGGCTGAGGTGACCCTTGTCTCTGTGTTCTTGTC
EGFRr18:1:40_f	GCTTGTGGAGCCTCTTACACCCAGTGGAGAAGCTCCCAAC
EGFRr18:41:80_r	TTTTGAATTCAGTTTCCTTCAAGATCCTCAAGAGAGCTTG
EGFRr18:+20:+59_r	CCCACCAGACCATGAGAGGCCCTGCGGCCCAGCCCAGAGG
EGFRr19:-57:-18_f	AGCATGTGGCACCATCTCACAATTGCCAGTTAACGTCTTC
EGFRr19:1:40_f	GGGACTCTGGATCCCAGAAGGTGAGAAAGTTAAAATTCCC
EGFRr19:41:80_r	CTTTCGGAGATGTTGCTTCTCTTAATTCCTTGATAGCGAC
EGFRr19:+4:+43_r	GGTTCAGAGCCATGGACCCCCACACAGCAAAGCAGAAACT
EGFRr20:-51:-12_f	TCCTTCTGGCCACCATGCGAAGCCACACTGACGTGCCTCT
EGFRr20:1:40_f	GGAAGCCTACGTGATGGCCAGCGTGGACAACCCCCACGTG
EGFRr20:41:80_r	GCTGCACGGTGGAGGTGAGGCAGATGCCCAGCAGGCGGCA
EGFRr20:81:120_f	TCATCACGCAGCTCATGCCCTTCGGCTGCCTCCTGGACTA
EGFRr20:121:160_r	CAGGTACTGGGAGCCAATATTGTCTTTGTGTTCCCGGACA
EGFRr20:+4:+43_r	TGGCTCCTTATCTCCCCTCCCCGTATCTCCCTTCCCTGAT
EGFRr21:-59:-20_f	GGATGCAGAGCTTCTTCCCATGATGATCTGTCCCTCACAG
EGFRr21:1:40_f	GGGCATGAACTACTTGGAGGACCGTCGCTTGGTGCACCGC
EGFRr21:41:80_r	GCTGCGGTGTTTTCACCAGTACGTTCCTGGCTGCCAGGTC
EGFRr21:81:120_f	ATGTCAAGATCACAGATTTTGGGCTGGCCAAACTGCTGGG
EGFRr21:121:+3_r	TACTTTGCCTCCTTCTGCATGGTATTCTTTCTCTTCCGCA
EGFRr21:+3:+42_r	GGTGTCAGGAAAATGCTGGCTGACCTAAAGCCACCTCCTT
ERBB2r20:-52:-13_f	GTGTTTGGGGGTGTGTGGTCTCCCATACCCTCTCAGCGTA
ERBB2r20:1:40_f	GGAAGCATACGTGATGGCTGGTGTGGGCTCCCCATATGTC
ERBB2r20:41:80_r	GCTGCACCGTGGATGTCAGGCAGATGCCCAGAAGGCGGGA
ERBB2r20:81:120_f	TGGTGACACAGCTTATGCCCTATGGCTGCCTCTTAGACCA
ERBB2r20:121:160_r	CAGGTCCTGGGAGCCCAGGCGTCCGCGGTTTTCCCGGACA
ERBB2r20:+15:+54_r	TTGTGGACATAGGGGTTTGCTCCGGAGAGACCTGCAAAGA
KRASr1:24:63_f	TCCACAAAATGATTCTGAATTAGCTGTATCGTCAAGGCAC
KRASr1:102:+29_r	CATTATTTTTATTATAAGGCCTGCTGAAAATGACTGAATA
KRASr2:56:95_f	AGAAAGCCCTCCCCAGTCCTCATGTACTGGTCCCTCATTG
KRASr2:153:+12_r	CTCCCTTCTCAGGATTCCTACAGGAAGCAAGTAGTAATTG
MAP2K1r2:29:68_f	GCTGGAGGAGCTAGAGCTTGATGAGCAGCAGCGAAAGCGC
MAP2K1r2:98:137_r	ACTGATCTTCTCAAAGTCGTCATCCTTCAGTTCTCCCACC
MAP2K1r2:147:186_r	GCTTGTGGGAGACCTTGAACACCACACCGCCATTGCCAGC
NRASr1:19:58_f	ATTCATCTACAAAGTGGTTCTGGATTAGCTGGATTGTCAG
NRASr1:108:+35_r	ATTACTGGTTTCCAACAGGTTCTTGCTGGTGTGAAATGAC
NRASr2:61:100_f	GCCTTCGCCTGTCCTCATGTATTGGTCTCTCATGGCACTG
NRASr2:129:168_r	AAACAAGTGGTTATAGATGGTGAAACCTGTTTGTTGGACA
PIK3CAr9:39:78_f	ATGACAAAGAACAGCTCAAAGCAATTTCTACACGAGATCC
PIK3CAr9:114:+27_r	ACAGAGAATCTCCATTTTAGCACTTACCTGTGACTCCATA
PIK3CAr20:141:180_f	CTAGCCTTAGATAAAACTGAGCAAGAGGCTTTGGAGTATT
PIK3CAr20:223:262_r	GCATGCTGTTTAATTGTGTGGAAGATCCAATCCATTTTTG
RET_1_r	GTCTCCACAACATCGCAGTGGCCGTCGGGGCAGGTCTTGG
RET_2_r	CTTACGGAGGCAGTCCTGAGGGCAAATGTTGATGTCTTGG
RET_3_r	TACTATCTCCTACCTGTTCCCATGCCCTGATTAAACCCTG
RET_4_r	GCAACTCTGGCTGAAGTGCCTGTGGGATCCAGGTTTCCCC
RET_5_r	CACAGGAGGCTCAGCTTGATGCATAGAACTGACAGCCCTG
RET_6_r	CTGCCTGCTCCCTCCCCATGGCTAGGGTGATGCTGAAATG
RET_7_r	GGACAGTCTGTGGGTCCCTGCCTTCCCCCTGTCCCTGACC
RET_8_r	AATCTGTGTGTGCCGACTTCTGGGACCTCAGCAGGGGCCT
RET_9_r	TTCCCTGTCAGTGTCCCTACTGACCATTCTCTGCTTCTGA
RET_10_r	CGCACATTGCAGTGTCCCTCGTCTGGCTCAGGGCCGCACT
RET_11_r	AAGGACTCTGCCTCCAAAACTGGAGCCTGGTGGCCTGACC
RET_12_r	TGGGTGAAGCCAGGCCCCCTCCTAACATTTCATCTGAACA
RET_13_r	TAGCCGGGCAGGGCTTGGTCACAGTGCCTTTCTGAAGCCA
RET_14_r	AGCATAGGCCCAGTGAGGCCAGGGGCCCAGCAGCTTGGCT
RET_15_r	GGCAGTGTCCCAAGGAGCCCCCTCCCCAACTGGTGTCGCA
RET_16_r	TCCTGGGGCGCCTGACCACCCCAGGCGCCCATATTTCCAG
RET_17_r	ACAATGCTGCCCCCTGAGGGCAGACGTAGCCCACTCAGCC
RET_18_r	AGCTTTAATCCCCCGGGGCTCCCCAGGCTCGTGTCCCCCA
RET_19_r	ACTTCTCCTCCTCAGGGAAGCAGTTGCAGGTGCCATAGCC
RET_20_r	GCCACCCACTCACCCTGGATGTCTTCGGGCTCGCAGAAGC
RET_21_r	GAGACCTCTGTGGGGCTGGGAGGTGGTGGTGGTCCCGGCC
RET_22_r	CAGCAATTTCCTCCCTTGTTGGGACCTCAGATGTGCTGTT
RET_23_r	AGAGGGAGGGAGGGAAGTTTCATGGGGCCCACTCGCCTCC
RET_24_r	GGGGCCCTGGCCCCTCTCCTGGGTGGAGTAACAGAGGCCC
RET_25_r	CCTGTCCATCATAGAACTTATGGCCAGAAGACACTTTACA
RET_26_r	CAGGCTGACAAGTTGTTTGGTGGAAGAACTGCTTTTCTGG
RET_27_r	GGTGGGTCCCAGCTGCATGGTCACAGGGACAGTGACTTGT
RET_28_r	TGCAACCCACCATACCTGCTGACCTTGAAATGTGTTCCTG
RET_29_r	TCAGGCAGAACAGCACCCCTGAGTGTAGTCAGTGTGGCTG
RET_30_r	TAATACCAGAAAACTCAATGACAGAAACGTGTCCCTATGC
RET_31_r	CTTTATGAAAATGCTAAGTGGCTAGGGACGTAGGGCTATA
RET_32_r	GGTCAAAATTTTCCTCTGTTCCAAATGTCTTTGGCATTTT
RET_33_r	TGCTCATTACACCAGCTGGCACTGGAGGGCTGGCAGGGGA
RET_34_r	AGAGGCTGAGCAGCCTGCCAAGGTCACACAGCAGAGGCTG
RET_35_r	GACCACTATTGCCCTCTTACAGATGGAGACAGAGGCTCAG
RET_36_r	CCCATCGAGCATGGGTACTGCCATTTACTGCCCCCTCCTA
RET_37_r	TGGGAAGTGGCCATGGAGGTGTGGGAAGGCCTGAGAACAC
RET_38_r	TCTGCCTCATGGCTCTCCAGCCTGCCGTGTCCGCGCCAGC
RET_39_r	CGCCAGAGGCTCGGCACCACTGGGTACAGGCTGCGTATGC
RET_41_r	AGGACAGCGGCTGCGATCACCGTGCGGCACAGCTCGTCGC
RET_42_r	GCAGAAGGCAGACAGCAGCACCGAGACGATGAAGGAGAAG
RET_43_r	AGATGGGTGGCTTGTGGGCAAACTTGTGGTAGCAGTGGAT
RET_44_r	AAGGCCTGGGCGGGCCTCCGGAAGGTCATCTCAGCTGAGG
RET_45_r	CGAGGGCCGGCGGGCACCGGAAGAGGAGTAGCTGACCGGG
RET_46_r	TGAAGGCATCCACGGAGACCTGGTTCTCCATGGAGTCCAG
RET_47_r	GGGGATCTTCCCTGCCCCGCAGGGACCCTCACCAGGATCT
RET_48_r	CCAGCTGGCCTCCCTCCCTGGAAGGCAGCTGGGGAGGGCA
RET_49_r	CCCAGCGTTGGCAGCCCCTCACAGGATGGCCTCTGTCTCC
RET_50_r	GCGCCCTATGGAAATGGGGGCAGAACACAGGCCTCGTCTG
RET_52_r	CTGTGACCCTGACCACTGCCTCTCACCTAGATGGGAACGG
RET_53_r	CAGTGCCCCTCCATCCACACTGCTGCTCCCCTGCCCGATG
RET_54_r	TGCAGGCCAGGCTCCCCAGAAAGGCACCCCCTTCTGACTT
RET_55_r	CTCGGCACAGCCTGGAGGCTCTGAGTAGCACATGCAGACC
RET_56_r	GCAGAGGCCTGCCTGGCCGGGACAAGGAGGCTCCAGGATA
RET_57_r	TAGTAGGAACACTGAAGGGGCAGGCCACCACCAGGAGAGG
RET_58_r	TTCCAGAACTGGGCTTGGCTTCCAGCGCCCTGGACAGTGC
RET_60_r	CCTGCCGAGGAGCTATTCACGCCACCATAAGCTGCGTGGC
RET_61_r	CCCTGTGGCCACTGGGTGCTCAGCTTCCTCCCTGGAGGCT
RET_62_r	TCCCAGGCCACCTCCCAGCCTGAGATGGGAACTGCCAGGG
RET_63_r	CAGGCTGAGCTGCACTGTGGGATATGGCCCCTCCCAGGAA
RET_64_r	GCTGGGTGTTGCCTGAACGGAGGCTCCAGGGCCGAGGCCT
RET_65_r	ACATCTGGGAAGGCCTCCTTGGCTCACACCCTTACCGAGG
RET_66_r	ACCACCAATTAGGAAAGCTGGTGGGGAAGCGGCAGTGGCC
RET_67_r	CCCTGCCATGAGGCTAAGCTGCAGCCAGGCCAGGATGGGG
RET_68_r	CCACTGGGTTTATGAAGGACTCTGGTGGCTCATCCTAGAG
RET_69_r	CCCAGACCAGTGCGGCCTTCCTGGGCAGCCTCACACAAAC
RET_70_r	AGCTGACTGGGGTTAGGGTGGTGGTCTCTGCCAGCAGCAG
RET_71_r	TCATGGGTCCAAGACCTGGTGCTGATGAGTGTGACTCTGG
RET_72_r	GGGCGACATCAACCTGATCCTCTCAAATACTGAGGTTGAG
RET_73_r	ACCTGTTTACCACACTCTAGAGACTGCAATAAGCACATGA
RET_74_r	GGCTTCCCTGCCGCTGTCACCTCCACAGCTGGCACTGGAA
RET_75_r	CCTGGGAACCCACAGTCAAGGTCAGTGTCGACACTGCCAT
RET_76_r	GTCTCCTGCTCCTGGGCTGTCCTGGTCTGGCCCCACATTC
RET_77_r	CCTCCCTTGATGTGCCAGCTCTGGGCATCCGTCACCCCAG
RET_78_r	CTCTGACCAGGGAGGCCAAAGCCTGCCATGATCCAGGAAC
RET_79_r	ATGCCTTCCCAGACCCCCACCCTGGCCCCCAGTACTTGAA
RET_80_r	AGTTCTATCCACACATTGGGCCCACTTGGGACTGCTCCGG
RET_82_r	CTGCTCCTCAAGGGCTGCCACTGGCCCTCACGCACCCGCT
RET_83_r	AGAAAGGCGCCACCATGTTCCGCCTCAGAGTGTGGAAGCA
RET_84_r	AAGTGTCCAGGACAACTTCTCTACATAGCCACCCCTGCAA
RET_85_r	ATGAGCACCAGGCCCAGCCCAGGACCTCTGACTACAGTGG
RET_86_r	CCTGGTCTACTGTCTCCCCTGACCCCTGCCCCAGGACTAA
RET_87_r	ACAGCATGGCTTGGACTCAGTACTTCGACCCTCTCTGGTT
RET_88_r	CAGCCAGGCCCCTGAAAGCTGCTACATGACAGGTGTGGTC
RET_89_r	AGCGGCAACGCTGCCTGTCTCTGCCCTGGGCAGGACCCCA
RET_90_r	ACAAGTTCCAATGTGCAGAGAACCGGCTGTCATCTGAGCC
RET_91_r	GGGGAGGAAGAAGGCAAGACCCTTAAAGGAGGCCCCATGG
RET_92_r	GGGAAGGGGGAGAAGAGGGGGGAAAAGTGTGAGGATGACA
RET_93_r	GAGGGAATTCCCACTTTGGATCCTCCTATGTTGGAAATGA
RET_94_r	TCGCCTTCTCCTAGAGTTTTTCCAAGAACCAAGTTCTTCC
RET_95_r	TTTCAGATGGAAGGCCGTTGCCTTGACCACTTTTCCAAAT
RET_96_r	TCAGCATCTTCACGGCCACCGTGGTGTACCCTGCTCTGCC
RET_40b_r	TGTGGGTGGGGGTGGTGTGAGGCTTGGCACCGCCAGAGGC
RET_51b_r	ATGGGAACGGCACCTCATCACAGTCCCACCCCACAGACTG
RET_59b_r	ACCCTTGGCTCTGAGCCTCTGTTACTTCCAGAACTGGGCT
RET_81b_r	GCTGGCACTACCACCCTGCCCTCCCACCAAAGTTCTATCC
ROS1_1_f	GCAGGAAGATTTTCAATCTCCTCTTGGGTTGGAAGAGTAC
ROS1_2_f	TGTAAAATAGCAACATTTTTGTCTCCCCACCCTCCACATA
ROS1_3_f	TATAGGGTGTACAAGTTTGTGTTGGTATTGGTATTTGTGT
ROS1_4_f	TTGAGAGAGAAAGAAATATCTCATGGCTTTGCAGTATTGT
ROS1_5_f	GTGTTTTATGTGACACGGTGATGTGGAACTTTGGGTTCCT
ROS1_6_f	AATTACTTTACTTTACTATTCTACAACCTTTTACCCAGAC
ROS1_7_f	AGAGCATGATGGTCCACTTCTAGGCACCTTAATTTTGATA
ROS1_8_f	AAAATATATATGTGTATGCATTGCCTCAACACTTTTATTG
ROS1_9_f	TAGCTTGTTGAGTCAAAGTTAGTAGGTATTAACTTCTTCA
ROS1_10_f	GATTGCCAATTTGTATAAAAAGCTACTGCAAATTAGTAAT
ROS1_11_f	AAATGCATCTGGGTTTATAAGCTTTTCTCTTAGCTATTTC
ROS1_12_f	ACACATGTGACATCTTACGTAAAACAAAATTTACTATGAC
ROS1_13_f	CAAAAAAATCAACCCCATCACCATAAGGTTAACTTTAAAA
ROS1_14_f	AGCCAAGTTTCTCACTTGGAATACTACAAGGGGGGAAAAT
ROS1_15_f	GCTGCTATGTTAAAAATGCTTTCAATTTTTAATAGAGAAT
ROS1_16_f	CTTGAGTAGCAGATATGCTGAGTATTTGCTCAAAGGAAAG
ROS1_17_f	TCACCTCTAAACAGCTGATTTAGATCACCTTTGTGTCTAC
ROS1_18_f	TTCAAATCCTTTGTTTTTACACCTTGCATTATAAATTTCT
ROS1_19_f	GAAAGCAAGGCCTATGATCATTTAATTCCTTTTTGCATAG
ROS1_20_f	ATCCTAATATAATGAACCTTTGCATAAGACACTTGAATAT
ROS1_21_f	TTTCCTTAATTATGACGGCAACAAAAGTTCAAAACTCATC
ROS1_22_f	TATCTTAAGAAGGTTTTGTGGGCAATCATCACACAACTTC
ROS1_23_f	TGAAATGGAGTAAGATTGACTTAAGGCTGACCACGTAACA
ROS1_24_f	CAAGGCTCTCAAAACTCCTCTCCTCTCAAACACTGCCTCC
ROS1_25_f	AGGTCAACCAACCATGTTACCATCTATTCTCTTCAATGTA
ROS1_26_f	ATATTTTTCTCCTTCTTTCATTTGTTTTTGAGCTACATGA
ROS1_27_f	CAAAATACTGGAAACTAATGGATTTTTCTGTATTTTTCTT
ROS1_28_f	AAAACCACATAATTTTCCATCCATCCCAGGTCACATTTGA
ROS1_29_f	GAGTGGAAGAGGAAGTTATTAATAATTATGCCAGAAAAAC
ROS1_30_f	TGGTATAAACCATGACTGTCTTGGGCAATGCGGAATTCAT
ROS1_31_f	AGGCACTCTCCTTACTGTTGCCCACCCTTTGCCTAGGTGC
ROS1_32_f	TCCATAATGATGGCCAAAGCTACATACTGTATTGCATAGC
ROS1_33_f	AGGCATTAGCCAGGCCTACTCCGGCTGCCAGACCTCGCAG
ROS1_34_f	CTCAGCCAACTCTTTGTCTTCGTTTATAAGCACTGTCACC
ROS1_35_f	CCTTCCTTGGCACTTTTTTGATTCTTTAATCTTCTATGCC
ROS1_36_f	AGACTATAAAGGAAAAAATGACATAATTTACAAAATAAAA
ROS1_37_f	TATTGCTTCTTTTTTCCTTTAGGAAATGTTAACAGTGCAT
ROS1_38_f	TTGAAGTGTTTTTATGCAAGAACACTATCAGTAGAATAGT
ROS1_39_f	TATAGAAGTTTTCATAATTTGATTTTAAAATATCTTATAA
ROS1_40_f	AAAACTAATTAAATCCAGGTAAAAAGCCATATATAAGTAC
ROS1_41_f	ACAAATCATACTACACCATTTTTAATCTCACTTCTTAAAA
ROS1_42_f	TTTAATGTATTTCTTACTGTTGTTATAAACAAATTAAAGT
ROS1_43_f	ATCTTAATATTAAAACTTATTTGTCAAAATCACCCATAAA
ROS1_44_f	CGAGTCAAAATAAACCAAAACAAACATAATTATTAGTGAA
ROS1_45_f	ACAAATTCATTTTTGAGTTCAGTCACATCCAGGTTATATT
ROS1_46_f	CCTCAGTAGAAAAGAAAATGCTTTCAGTATAATGGCAATT
ROS1_47_f	TTTTTTTTTTTTTTTTTTGCAGAGTACAAGAGTGTTTATC
ROS1_48_f	ATTGTTGTTCATATACACATACTCGAATATGTAGAAAAAG
ROS1_49_f	TATTGGAACGAAGCTTACCAAATGTTAGCAGTGGTCTGCC
ROS1_50_f	CTAGTTGTAGAATCATGAGTAATTTGTACTGTCTTCCTTA
ROS1_53_f	TACTGGACTATTGGCTCAGAAGTTGAAAGCAGCAAGCATG
ROS1_54_f	CTTTGAGAGATGATCATTAAAATTTGAACTTAATTTCACA
ROS1_55_f	GTAGCTTCTATGTTCAAGAAGTTAGAGTTTTATTCACATG
ROS1_56_f	AAATTCAATTTGAAGGGCTACACAGTGAAAGATCACAAGT
ROS1_57_f	ACCTTTTGCTAAATTAATTTTTCCAACTTGAAATGTTCTC
ROS1_58_f	ACCACCTCGCTTCACTTTTAAAGGCCCAATGTAAGCCCAC
ROS1_59_f	ATCCTCAATGATGCCTTCTGAAACCTCAGCAACCTCTACT
ROS1_60_f	AATCTTTCATATCTGAACTTGAAAGACTAATTGCGCCTCT
ROS1_61_f	CTGTGAGTGCTTATCCTATGCACTGTCTTACTTATTTCAT
ROS1_62_f	CTATTTTTGTCTTTTGTTATTATTTAACACATATCTTGCT
ROS1_63_f	ATTTGTCTTCCCACACAGGCATGTCTTAACTCCCTCATTA
ROS1_64_f	AATGGCAAGCTCCTGAGGTCAGCAGTTGTATTTTACAGGT
ROS1_65_f	TTACATTTTCCCCTACTCCCAGCAGAAGGCTAATGTTATG
ROS1_66_f	CATTAGATATGACTGCTCAGAAGCAAAGGCTGTCAACACT
ROS1_67_f	CATTTTAAAAATTGTCTAATTTTATGTTTATAACTGATGA
ROS1_68_f	GTGCCCTCAGCACAATACAAATTTTAAAATAATTGTGACT
ROS1_69_f	GTTTTGTTATTTTAATTACTCAATCTTTTCTCATGCACAC
ROS1_70_f	ACACGCTCTTACTAGTAAAACCACATGCACTGCTGCTAAA
ROS1_71_f	AGCAAAGAACCGAATTAGCTTAGCTAGACTCAAAAATTCG
ROS1_72_f	TGAATTTCAAACAGAATAAAGACCTTTAAGTCCTGAGAAA
ROS1_73_f	GTCAGATATCCATAGGATGTCTTGGAAGCACAATAGGTTG
ROS1_74_f	TCTGAAATTATCTCATGTTCATCCACTAGAGTTATGGGTT
ROS1_75_f	TAAACAATGGTGATGTACAAGAAAGCAAGCAAAGGTCAGC
ROS1_76_f	TGAAGGATTCTTCATGTAATTCTCCTTCCCAGTAGGAAAG
ROS1_77_f	CAGACAAGCAGTCAAGCCTATATGCCAACTGCCAAATATA
ROS1_78_f	CTGCAGTCATATGCGTAAGTCTGGAGGGGCTGGCTTAGTG
ROS1_79_f	GCACAAACATCAGCTGTGCAATACTTAGACTCTCTGGAAC
ROS1_80_f	CACAGGTTAAAATCCTGGCAGGGTCAGCTGAAATTTTTAG
ROS1_81_f	CTTTCCAAGTTTGCTGAAGGAGTTTCACATATTGTCTGGG
ROS1_82_f	TGGAATCTTTGAAAAAAATCTCAAATCGAGCTTCAAAGTG
ROS1_83_f	CTCTCATAAAGATTGTGACTCCAATCACTTTGCAGAAAGA
ROS1_84_f	ATAAAGACTTAGAACACAGTAAAGTGTTGGCTGTCTTTAT
ROS1_85_f	CCTGAGAGTTCAACTTTATGTTTGTGACTTTTCCATCAAC
ROS1_86_f	TTTCCCTTGTAACTTACCCCTACTTGTGAACAAAACAAGC
ROS1_87_f	CACAACTTTCTTAATATGTGTTTGAGTGTTCTTTTCTGGT
ROS1_88_f	AAGAATCATGCCCTTCTTTTAATGATTCAGTGTGTTGGGG
ROS1_89_f	ACTCTCAATATTAGCAATAGATAGGGGTCCATATATCTTA
ROS1_90_f	TAAGCAAACTCGGACAGTTTGGGGAATGAAAGAAAGTGCT
ROS1_91_f	ATTATTATTTGTGCTGAAACAGAAATAAACAAGAATGTAT
ROS1_92_f	GATCACTGTGATAACTCTAAAAGTCCAATCAGTACTTGAC
ROS1_93_f	CATTCCCTTTGAGGTTTTTACTGCATTTTATTATCATTAA
ROS1_94_f	AGTAAATCTTCTTAGAAAAAAAATAGCTTTCTATCTACCT
ROS1_95_f	AACCTAATTTTTCTGCCTTCCTGGTCATTTATAAATGAGC
ROS1_96_f	AGGGATTTGAAATAAGCAGATCAGATGTCTGAAAGCAAGA
ROS1_97_f	GTCGATCCCACAAGCCAGAAATGGATCTTCTGCAAAAGAG
ROS1_98_f	GCCCTACTCATTCCAAACCAGCCTGTCTGCTTAGAAACCA
ROS1_99_f	AAACTATCCCAATCAAAGATTGTCACTGGCCTCCCATTAA
ROS1_100_f	TTCTATACTTTTTTCTGTACCCAGGGTTATTTTTCTTTTA
ROS1_101_f	TTTATTTTAAACCATAAGCCACAAAACATTTGTATGCAGC
ROS1_102_f	CAATCAGAAATAAATACTGTTTTAAAGAAACCTAAAAGTT
ROS1_103_f	GGTGCCCTTGCAAGTAGTTTTATCTAAAGTATAACATGAA
ROS1_104_f	ATGTACATGTATATTTTCCATAAAATAGTTATGCCTAGAT
ROS1_105_f	CAGAAAACAATTCACAGAAGTTAGTGGTTATAAATGTATA
ROS1_106_f	GCCAAAGGTAACAATGTAAATTTTATTAACTTAATCAGGC
ROS1_107_f	AATATTTCATGTGGGAGATTAGATCAACTAAGAGATAAAT
ROS1_109_f	AAAAATTCTATTATACTTACCAAAGGTCAGTGGGATTGTA
ROS1_110_f	ACAACCAGAAATATTCCAACTATAATAGTAAGTATGAAAC
ROS1_111_f	TTGTTTCTGGTATCCAAAAATCATCTAATAATATAAATCA
ROS1_112_f	GAAAAAGAAATTAATTCATAGATAAAAGCTAAGTTGCCCC
ROS1_113_f	AGCTCTACCTAAGCACACAGAGTAATATAGCAGAGCTAGC
ROS1_114_f	TACTACTGGATTTTTGCAAGCCAGTTGTTAGACCGTTGGT
ROS1_115_f	AGCTTGAAAGCATCCATACAGACAGTGTTTATGCCATGTG
ROS1_116_f	AAATCAAAAGCAAGGTGTTTTTGCTTTTTTTTGCAGAGAG
ROS1_117_f	CAACAAACCACTGGAATATATCCACTCAATCTTCTACTTT
ROS1_118_f	AAAATGACTTAGGAAACATATATATCTTTTTAATAAATTT
ROS1_119_f	AGGACCAAGAAATCTCAGTCTTTGGATACTAAATAGTTGG
ROS1_120_f	CATTATTATTTTGTATAATATCTTCATACATATTTAATTT
ROS1_121_f	CATGGATATTAAACTGAGGAATAAACATGGTAATTTCTCT
ROS1_122_f	TAGGTAGTTTCAGTTGTGTAGAGGAAACAAACACGTAGGC
ROS1_123_f	CAGAGTCTGGCAAACTATGGCATGAGGACCAAATCTGGCT
ROS1_124_f	ATAGCCTGATTTTGTACCCCCTATTAGCTATGAATAAGTT
ROS1_125_f	TTACCTTTGTAAAGTGTTATTTTTAAAAAGAAGGAGAAGG
ROS1_126_f	AAAAAGAGAACAGAAAAAGAAGAAAAGAAGAACATGCTAC
ROS1_127_f	AGAGATCACATGTAGCCTGCAAAGTCTAACATATTTACTA
ROS1_128_f	TTTGGTTCTTTTCAGAAAAAGTTTGCTGAGCTGGGTAGCA
ROS1_129_f	AACTTCTGTACACAACTAACTAGATAACTAACTATAATAT
ROS1_130_f	AAACAAGAATCATGTAAGTTTTATATAGCATGTGAGTGTA
ROS1_131_f	TAAAATGCAATAATTCATTTGACTAAGGAGCATCAGGTAA
ROS1_132_f	GCATTATGATGAGTTCATTTAAGTCTTGAAGGATGAGAAG
ROS1_133_f	AATTTCAATTGGCAGAAAATAAATAATAGGAAATCACAGC
ROS1_134_f	TAAGGGGCACAGGGTAGGTAGTGGGGACCTGTATTCTAGG
ROS1_135_f	CTGAGGCAAACACAGGGCCAAAGACTAAGTGACATAAAAA
ROS1_136_f	CTTTTTACTGGTCTGATATGGCTACAGCACAGACATAAAT
ROS1_137_f	ATTGGAAAAGATAAACCACAATTGGAGGATAAATTACAGA
ROS1_138_f	AGACCTCACATGCCACAAAGAAGTTTGTAGCTGATTCTGA
ROS1_139_f	AAGCAGTAAATGGAGAGCCATTGTGGGTATTTCAGAGAGG
ROS1_140_f	GATTAAGTAATCCAGCCTGTGCTTCAACTAAATTTAACTG
ROS1_141_f	TCAGCAGTATGCGTAAGTCAAGGGCACAGGCAAGAAATGA
ROS1_142_f	TACCTTAAATTAGGAAAGCCAAGGTGGAAAGAGGAAGATG
ROS1_143_f	AGAACTCATCAGAGAAAAATCAAGATGGTAAAATCAACAG
ROS1_144_f	GACCTGATTACTGAGTAGAGGGAAAAATCACATATGGCAC
ROS1_145_f	TGAGATTTCCTGCCTATGTGATTAGAAAGACAATATATCA
ROS1_146_f	TAAACTAAAATAAAATACACAGTGGAAGAGGTAGATATTG
ROS1_147_f	GGGAAGAAACAAAGGTCTTAGGCCTGTTATGTATAATGTA
ROS1_148_f	GGAGTGGTCATAAGGCTGGTATAATGTGAATAGAATTATA
ROS1_149_f	TGGCTGGATAGAACAGATTGTGAACAGCCTTGGAAGCCTA
ROS1_150_f	ATTAGGAGCATGGAATTGATGTGGTAGGAATTAAGGGGGT
ROS1_151_f	GGCTGATTATTATTGGGGAGAAAAATGACATGATGATAAT
ROS1_152_f	GATGTTTTAGAAAGATCACATCACATGAATGGAATAGTTT
ROS1_156_f	AAGCTAGTGTGTAGACAGACATGGTAACATACCTCCAACT
ROS1_157_f	AATATAATATTCTCACTGATTCCACTATATTCACCAAACC
ROS1_158_f	CTAGATTATTTGCAGCTACTACTCTGAACTGAAATATTCC
ROS1_159_f	TTTCAGGTTTTTGGACTTCCATGTGCAAACACTACTGCAG
ROS1_160_f	GATCCATTAAATGTCATCTTCCACCTTAAATTCTGGTTCT
ROS1_161_f	GTAAATTATTTGAAGTGCTCTTTCTGCAAAAAATAATAAA
ROS1_162_f	TACAGAAAATATACATGACAATATACCTGTTATTTCTAGT
ROS1_163_f	TGTTCATAGATCTTCTTAGTGACTGAACGCCAGAGAGTGT
ROS1_164_f	CCTTTGGCACAATTTACCCTTGACCTCATTCCTCTCCCAT
ROS1_165_f	AATCTGGCAACACAGATGCTAACAGCATGGTTTTATAGTG
ROS1_166_f	ATCCTAGTGAGGCATGGAGCCAATTAACTCAGCCCACCAA
ROS1_167_f	GAAAACTGTGAGTAATCAGTGGTGAAGAGAGAGCTGAGTA
ROS1_168_f	CCTTTTTCCTATACTAACAGCATGGGTAAACTTTCTCCAG
ROS1_169_f	AATTCCAAACCTATAAGACAATTATTCCATGATTTTTAAC
ROS1_170_f	TGGGAAGTTTCCATTTTCTCAATTTTCAGTCTTTTACATT
ROS1_171_f	ATTTGTAGTTTACTTATGCCATATTTCAATAAAATACAGA
ROS1_172_f	ATACAAAATTGATAAGGAAAGTGTGACAGTTCAGCTACCA
ROS1_173_f	AAGTTATCATTATATCTGAGATTCTGAGGCTCGTTGCTTC
ROS1_174_f	CTTTTGTATTGACCTACATTCCACCTCAAAGTCAATCCAA
ROS1_175_f	TTGTTTTTCATTTGAAACATGGAAGGAGCACAAGGGCTGG
ROS1_176_f	GTTCAAAAGACATAACTGGAATGACTTTTTACAGAATCAT
ROS1_177_f	CAAAGGCAAGCTCAAGGTCTTCCATTATGTCTTCTCTAAC
ROS1_178_f	AATGAAGAATATTTCAGGTCTGAAACTTTTCAGACCGCAA
ROS1_179_f	TAGTTTTAGGACTTGGTGCCAATCCACGGTAAGCTTAGGG
ROS1_180_f	ATATGTGGGAGAATCTGGTTCTATTCCTGCTAATTGACTC
ROS1_181_f	ATCCTTCTGAAGACCAACAGAGAGTGAAGGCTGGCCCTCA
ROS1_182_f	TAAGAGGCAGGGAAAGGGTAAGAACATCGGGAGCAGCAGG
ROS1_183_f	GCAGCAGAGTTGGTCACAGCTGTTCCCCGGAGCTGAGGGT
ROS1_184_f	CCCTTTAAGGACCATCCTGAGCAAAGCATTAGGACAGAGT
ROS1_185_f	GTTTTTACACATTTTGTGACGTCTCACCTTTAGCATTGGC
ROS1_186_f	CATTTCACTGTTTAACCAAACAACTCTGATCCAAAAGAAA
ROS1_187_f	GAGGCCCTTGAGAATTTGTGAAGTGGCTCTACACAATGGC
ROS1_188_f	CATTGAGAAAAGAAAGAAGAATTCTGATGTTGGTTGAGCA
ROS1_189_f	CCTTCTATTTACAACATACTGTACTGGGGCTTTACATAAC
ROS1_190_f	GTTGTTTTAATTCACTGAGTCCACAACAGCTTAAAGAGAT
ROS1_192_f	TTAAGTTCAAAAAAGGAAAAGAACAAGCATTTAAACATGG
ROS1_193_f	TTTGTGTACTGGATTGAGTCATGTCCTCCCAAAATTCATA
ROS1_194_f	CCCACTCAGAATATTTTAATGTGACCTTGTTTAGAAATAA
ROS1_195_f	GATCTTGACAAATGTAATCAAGTTAAGATGAGGTCATAGT
ROS1_196_f	AGTTTAGGGTGGACCCTAATCCAATGACTGGCACTTGCAT
ROS1_197_f	AAGAAGAGGGAAATTTGGACACAGAGAACACCTTGTGATG
ROS1_198_f	CAGGAGGTGATGATGACAGTGATGCACCTACGAGCCAAGG
ROS1_199_f	AATACCAAGGACTGCCAGTAAACGCCAGAAGCTAAGAGGC
ROS1_200_f	AAAGATGGATTCTGCCCTAGAACCATCAGAACAAGCAGTC
ROS1_201_f	CCGCTGATACGTTGGTTTCAGACTTCTAACCTCTAGAGCT
ROS1_202_f	GTAAGAATAAATGTCTACTGTTTCAAGCCACCCAGTTGGT
ROS1_203_f	GGTCCTTTATTGTGGCAACCCTTGGAAACTAATAAGGCTT
ROS1_204_f	GTTCAACTCCCAAGTTCATGCACTTTGCACTTCCACTACC
ROS1_205_f	CCATCAGTGAGTACACAGAGTCTAACTAGAGTGTCCTGAC
ROS1_206_f	TGAAGGACTTATTTTGAGACACTGAAGTTACAACAATCAT
ROS1_207_f	TCAGTCATCCTATAGTCTATGTCCTGACAGTGGAGACCTG
ROS1_208_f	GAGCAAGGAGTATGCAAAGTATTTAGATGGAGTCATTTTA
ROS1_209_f	GTAGCACTTAAGGTGTTACTCAGGGTAACACACAAAAGAG
ROS1_210_f	GTCCTAGCAAAAACCTGATGTGTGACCTGATTGATGAACA
ROS1_211_f	TCATTACAGTCACAAACCACCAAGACAGTTCTGCAGGTTA
ROS1_212_f	GAATGTATTTCACTCTGCATGAAAAGCAGCAACAGAAACT
ROS1_213_f	TCAAGGAGGTTTCAATTAGAAATAAGGGCCAAGGGAATTC
ROS1_214_f	TCTAGTATGAACAGGAACATTTTTTAAGGTTATGGGAATG
ROS1_215_f	CCAGAGCCAGATGAAGCAAAAATAGATCTAAAGATCAAGT
ROS1_216_f	TGCCAGGACTATAATTATGGAAGTGACTTTTGTCCTTGGA
ROS1_217_f	ACTTCTTAAAAGATGGTTTCATAGTCCTGTGAGAGGAGTG
ROS1_218_f	TCTTTGGAATTTGGAATTCTCCCCTCAAGTTGGCATGAAA
ROS1_219_f	TCAGTCCTTCTAAGCCAGTTATGGTTCACGTGCTCCCCGT
ROS1_220_f	ACTGGCCAGGTCTGAGGCTGTTCATCAGTGGCTGGTTTTC
ROS1_221_f	ATCGACGGTGTGTTTTCAGTCCCTGGGAACACATTGCAAA
ROS1_222_f	CTGTAATCTTCCCAATGAATACAGAATCCTGTGTGACCTC
ROS1_223_f	TACACTTCAGACCATTTCAGAACCTGACCTAATTTTACAG
ROS1_224_f	TATGAGAAATATCTACTTCATCACCATTTCTCACTAGAGA
ROS1_225_f	GTATTCACCTTGCTAAAGCAAATTATCATCAGGAATTTAC
ROS1_226_f	ATGCCATCATTATTTAACATTAAACATCAGCTAAGCTTTT
ROS1_227_f	TAAACAAAACTGATATTAAGTTAATACTGGTTGCATGAGC
ROS1_228_f	CTATGATCAAACAATTTCCATAAAGTGTCAATGAGCAGTT
ROS1_229_f	AGAGATTTCTGAGAATGACGTGATCTGTTTATAATTAGCA
ROS1_230_f	TGCCAAGACCAACGTCTAGGAATTGAGCAAAGAACGTAAT
ROS1_231_f	GATGCATGTGAGTCCTTTAACTAAAGATCTTTGTGTTTGT
ROS1_232_f	ATATAAATACATTTGCATAAATAGTGTTACTTTTGATTAC
ROS1_233_f	TTTATAATTATCTTCTTAGTTCTTTGTCATTTACAAGTAC
ROS1_234_f	TTTGCAAACACACATACCTTATCTCAAGGATATAGTATGT
ROS1_235_f	AATTCTACATCCATTATCTTCAGCTTTCTCCCACTGTATT
ROS1_236_f	GAATTTTTACTCCCTTCTAGTAATTTGGGAATGCCTGGTT
ROS1_237_f	TATTTGGGACTCCAGCTTTAGGGAAAAAAAGAAAATATTG
ROS1_51b_f	GTACTGTCTTCCTTATATAATAAGCAGTATTAGTTTTATA
ROS1_52b_f	ATACAATTATGTCAATAGGATTGTCATCTGTACTGGACTA
ROS1_108b_f	AGAGATAAATCAATCAGGTATGATTAAGTAAACAGTTTGT
ROS1_153b_f	TCACATGAATGGAATAGTTTAATAGTTTGGATAATAAGAT
ROS1_154b_f	AGTCACCATTATCTATTGCTAATGTTAAGAATGTACTGAT
ROS1_155b_f	CTGATATTTATTACTGAACCTTTAGGTAATAAGCTAGTGT
ROS1_191b_f	CCACAACAGCTTAAAGAGATAAGATAGATATTATCATCTC
ROS1_238_f	TGATATGTTTGAAGTATTAATCTTCTGCACTGAAATCTTT
ROS1_239_f	CTACAGAATATATTAAGAGGAAAGACAACATTAAAGAAAT
ROS1_240_f	TGGCCGACTAGAAGCAACTCCGTTCAGAGGTTCCTATTGA
ROS1_241_f	TGAGTCCTTCACCGGCAAGGTATCTAGATTCGCTCATCAA
ROS1_242_f	CCCCCTCCCCTCCAGCCAAGGGGAGCGGCGAGCGAGCAGG
ROS1_243_f	CTACCCAGCCGGGGAAATTGCTTTTCCAAAGAACTGTGCA
ROS1_244_f	CCTAACACGCTAATCTCCCTGGGCGGCGGGGAGAAATGCA
ROS1_245_f	TTATATGATTACATATTTTTAAATGAGCATTTGAAGTTTT
ROS1_246_f	TATTAGTGATGGATTTGATGAATTGGTGATAAGATTAACA
ROS1_247_f	ATATATCTCAACTTGAAACAAAATAAGTGATAAATGAAAA
ROS1_248_f	TAAAGAAAACTATCATAAGTTTTGGAGCATTTTCCCTCCA
ROS1_249_f	TTTGTTCCTTCCATTCTTATAGAGCTCATCTCAGAGTTAA
ROS1_250_f	GGTATATCTTTCAGAACACTAGTTAATTTTTAATGAACTT
ROS1_251_f	CTTATATTTTTCATCCTAGTATCTCAAATATAGTAGCCAA
ROS1_252_f	TAAATATTTTTTGAACATTCAGTAACACTATTTTCATATA
ROS1_253_f	GTTATCACCATAAAATTGTCATAGCTAGACATGAAATAAG
ROS1_254_f	GATACTGAAAGAAGAAGTAATTTTGCCCAGTTCAGGATCC
ROS1_255_f	AGCCAGACCCAGCCAGTATTATTTCATTACTGCCTGCAAG
ROS1_256_f	GTCTCCTATATTTTCTGAATTTCTTCATTCAAGTTCTAGA
ROS1_257_f	AATAATAATGTACTGCTTTTAAAGAACAATTTCATATATC
ROS1_258_f	TCTAGGATTAGTGAAATAAGTGATAAGAAAAAAACTGAAA
ROS1_259_f	CACAGAGTTTTCTGAGTATTGAGTATGTTAGTACTCACCT
ROS1_260_f	TTTGTCTTAAAGCTTTCTGGAAGTGAGGTGCTATTTTCTC
ROS1_261_f	CCGTCTTATAAACCACCACTACTCTGACATTATATGAAGT
