# Supplementary material for: Bias-Corrected Targeted Next-Generation Sequencing for Rapid, Multiplexed Detection of Actionable Alterations in Cell-Free DNA from Advanced Lung Cancer Patients
Source: Oxford University Press journal article supplement (doi:10.1158/1078-0432.ccr-15-1627-t), 2015-10-13
Supplement: 10780432ccr151627t-sup-152484_1_supp_3149952_nss3kj.xlsx [file 10780432ccr151627t-sup-152484_1_supp_3149952_nss3kj.xlsx]

## Sheet: Complete Phase II dataset
				Pool 1 - 2.5%			Pool 1 - 1.0%			Pool 1 - 0.4%			Pool 1 - 0.1%			0.1% repeat			0.1% reseq
Pool 1	Cell line	Gene	Mutant allele	WT reads	Mut reads	%	WT reads	Mut reads	%	WT reads	Mut reads	%	WT reads	Mut reads	%	WT reads	Mut reads	%	WT reads	Mut reads	%
	PC9	EGFR	KELREA745K	2887	28	0.00960549	4318	8	0.00184928	3814	5	0.00130924	4415	0	0	7681	0	0	8344	0	0
	A549	KRAS	G12S	1567	36	0.0224579	2341	15	0.00636672	2280	11	0.0048014	2411	2	0.000828844	4325	0	0	4667	0	0
	H2228	ALK	EML4	1786	16	0.00887902	3257	12	0.00367085	2577	6	0.00232288	2665	4	0.00149869	5095	0	0	5651	0	0
	H2228	TP53	Q331*	2015	31	0.0151515	3606	13	0.00359215	3099	6	0.00193237	3312	0	0	5754	2	0.000347464	6196	2	0.000322685
	HCT116	KRAS	G13D	1514	12	0.0078637	2289	7	0.00304878	2239	4	0.00178333	2365	4	0.00168848	4237	1	0.00023596	4567	1	0.000218914
	HCT116	PIK3CA	H1047R	1860	25	0.0132626	2717	7	0.00256975	2484	6	0.00240964	2568	2	0.00077821	4599	1	0.000217391	4976	1	0.000200924
	H2347	NRAS	Q61R	1821	87	0.0455975	2852	50	0.0172295	2651	21	0.00785928	2870	5	0.00173913	4991	2	0.000400561	5416	2	0.00036914
	HCC78	ROS1	SLC34A2	1267	4	0.00314713	1925	2	0.00103788	1824	1	0.000547945	2256	0	0	3357	0	0	3712	0	0
	SK-MEL-2	NRAS	Q61K	1823	17	0.00923913	2853	4	0.00140007	2651	4	0.00150659	2858	3	0.00104858	4997	3	0.0006	5421	3	0.000553097
				Pool 2 - 2.5%			Pool 2 - 1.0%			Pool 2 - 0.4%			0.4% repeat			Pool 2 - 0.1%
Pool 2	Cell line	Gene	Mutant allele	WT reads	Mut reads	%	WT reads	Mut reads	%	WT reads	Mut reads	%	WT reads	Mut reads	%	WT reads	Mut reads	%
	H1975	EGFR	T790M	1580	24	0.0149626	3063	14	0.00454989	2817	12	0.00424178	7009	8	0.00114009	3777	3	0.000793651
	H1975	EGFR	L858R	2188	18	0.00815956	4754	8	0.00167997	4203	4	0.000950796	10717	18	0.00167676	6525	3	0.000459559
	LC2	RET	CCDC6	1272	16	0.0124224	2576	7	0.00271003	2305	6	0.00259628	6388	14	0.00218682	3405	1	0.0002936
	H3122	ALK	EML4	577	2	0.00345423	1242	3	0.00240964	1086	4	0.00366972	2968	0	0	1673	0	0
	H3122	TP53	E285V	2123	6	0.00281822	5267	20	0.00378286	4638	10	0.00215146	9810	11	0.00112005	5736	4	0.000696864
	H1666	BRAF	G466V	1057	6	0.0056444	2120	5	0.00235294	1735	4	0.00230017	4542	5	0.00109963	2494	5	0.0020008
	H1781	ERBB2	G776VC	1972	25	0.0125188	4266	15	0.00350385	3564	7	0.00196024	9788	16	0.00163199	5760	4	0.000693963
	SW48	EGFR	G719S	1255	20	0.0156863	2681	6	0.00223297	2058	3	0.0014556	5576	11	0.00196886	2832	0	0
	SW48	MAP2K1	Q56P	1475	17	0.0113941	3190	15	0.00468019	2720	4	0.00146843	7447	10	0.00134102	3889	1	0.000257069
	SW480	KRAS	G12V	905	18	0.0195016	2067	7	0.00337512	1583	8	0.00502828	4218	9	0.00212917	2314	0	0
